# Supplementary material
Source: Springer Nature journal article supplement (https://www.springermedizin.de/resource/supplementary/13046_2009_154_MOESM4_ESM.pdf/9661748)

GDP-loaded cells

GTPγS-loaded cells

Control (15 min)

Crosslinked  $\alpha 6\beta 4$  (15 min)

Control + EGF (15 min)

Crosslinked  $\alpha 6\beta 4$  + EGF (15 min)

Control (30 min)

Crosslinked  $\alpha 6\beta 4$  (30 min)

Control + EGF (30 min)

Crosslinked  $\alpha 6\beta 4$  + EGF (30 min)

Activated Rho (GTP-Rho)

1 2 3 4 5 6 7 8 9 10

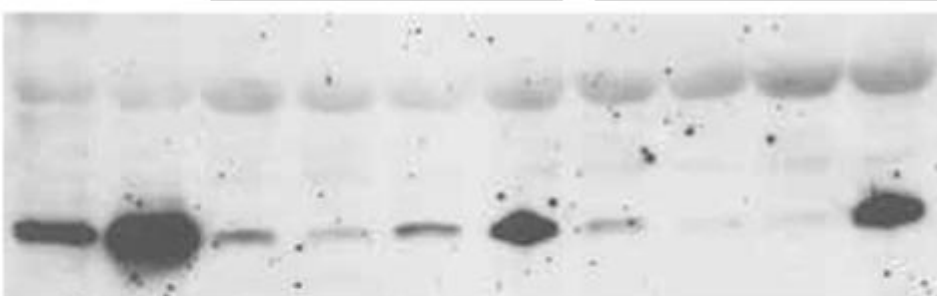

Supplement: MOESM4 [file 9661748]
